# 1 **A neural network account of memory replay and knowledge consolidation**

2 Short title: Category replay in deep neural networks

3 Daniel N. Barry<sup>1</sup> and Bradley C. Love<sup>1,2</sup>

4 1. Department of Experimental Psychology, University College London, 26 Bedford Way, London,

5 WC1H0AP, UK

6 2. The Alan Turing Institute, 96 Euston Road, London, NW12DB, UK

7 Corresponding author: [daniel.barry@ucl.ac.uk](mailto:daniel.barry@ucl.ac.uk), ORCID ID: [0000-0002-2474-5651](https://orcid.org/0000-0002-2474-5651)

8

## 9 **Abstract**

10 Replay can consolidate memories by offline neural reactivation related to past experiences. Category  
11 knowledge is learned across multiple experiences and subsequently generalised to new situations.  
12 This ability to generalise is promoted by offline consolidation and replay during rest and sleep.  
13 However, aspects of replay are difficult to determine from neuroimaging studies alone. Here, we  
14 provide a comprehensive account of how category replay may work in the brain by simulating these  
15 processes in a neural network which assumed the functional roles of the human ventral visual stream  
16 and hippocampus. We showed that generative replay, akin to imagining entirely new instances of a  
17 category, facilitated generalisation to new experiences. This invites a reconsideration of the nature of  
18 replay more generally, and suggests that replay helps to prepare us for the future as much as  
19 remember the past. We simulated generative replay at different network locations finding it was most  
20 effective in later layers equivalent to the lateral occipital cortex, and less effective in layers  
21 corresponding to early visual cortex, thus drawing a distinction between the observation of replay in  
22 the brain and its relevance to consolidation. We modelled long-term memory consolidation in humans  
23 and found that category replay is most beneficial for newly acquired knowledge, at a time when  
24 generalisation is still poor, a finding which suggests replay helps us adapt to changes in our  
25 environment. Finally, we present a novel mechanism for the frequent observation that the brain

26 selectively consolidates weaker information, and showed that a reinforcement learning process in  
27 which categories were replayed according to their contribution to network performance explains this  
28 well-documented phenomenon, thus reconceptualising replay as an active rather than passive  
29 process.

30

## 31 **Author Summary**

32 The brain relives past experiences during rest. This process is called “replay” and helps strengthen our  
33 memories and promote generalisation. We learn over time to categorise objects, yet how category  
34 knowledge is replayed in the brain is not well understood. We used a neural network which behaves  
35 like the human visual brain to simulate category replay. We found that allowing the network to  
36 “dream” typical examples of a category during “night-time” consolidation was an effective form of  
37 replay that helped subsequent recognition of unseen objects, offering a solution for how the human  
38 brain consolidates category knowledge. We also found this to be more effective if it took place in  
39 advanced layers of the network, suggesting human replay might be most effective in high-level visual  
40 brain regions. We also tasked the network with learning to control its own replay, and found it focused  
41 on categories that were difficult to learn. This represents the first mechanistic account of why weakly-  
42 learned memories in humans show the greatest improvement after rest and sleep. Our approach  
43 makes predictions about category replay in the human brain which can inform future experiments,  
44 and highlights the value of large-scale neural networks in addressing neuroscientific questions.

45

## 46 **1. Introduction**

47 Memory replay refers to the reactivation of experience-dependent neural activity during resting  
48 periods. First observed in rodent hippocampal cells during sleep [1], the phenomenon has since been  
49 detected in humans during rest [2-6], and sleep [7, 8], These investigations have revealed replayed  
50 experiences are more likely to be subsequently remembered, therefore replay has been proposed to

51 strengthen the associated neural connections and to protect memories from being forgotten.  
52 However, in this paper we challenge the notion of replay as a passive, memory-preserving process,  
53 and propose it is much more dynamic in nature. Using a computational approach, we test hypotheses  
54 that replay may be a creative process to serve future goals, that it matters exactly where in the brain  
55 replay occurs, that it helps us at particular stages of learning, and that the brain might actively choose  
56 the optimal experiences to replay.

57         Replay is assumed to constitute the veridical reactivation of past experience. However, there  
58 are circumstances in which this may be suboptimal or impractical. For example, a desirable outcome  
59 of category replay is to generalise to new experiences rather than recognise past instances, a  
60 phenomenon observed after sleep in infants [9, 10]. In addition, although sleep benefits category  
61 learning for a limited number of well-controlled experimental stimuli [11], in the real world category  
62 learning takes place over many thousands of experiences, and storing each individual experience for  
63 replay is an impractical proposition. For these reasons, we propose the replay of novel, prototypical  
64 category instances would be a more efficient and effective solution. In fact, given the role of the  
65 hippocampus in both replay [8] and the generation of prototypical concepts [12], we consider this the  
66 most likely form of category replay. The replay of novel [13] and random [14] spatial trajectories have  
67 been decoded from hippocampal “place cells” in animals. However, due to the complex nature of  
68 category knowledge, detecting such novel replay events from human brain data would be challenging.

69         The occurrence of replay in humans is associated with subsequent memory [8]. However,  
70 establishing a causal relationship between observed neural reactivation and memory consolidation is  
71 problematic. Replay has been observed throughout the brain, early in the ventral visual stream [6, 15,  
72 16], in the ventral temporal cortex [17, 18], the medial temporal lobe [5, 19] the amygdala, [3, 20],  
73 motor cortex [21] and prefrontal cortex [22]. It is not known if replay in low-level brain regions actually  
74 contributes to the observed memory improvements or whether the key neural changes are made in  
75 more advanced areas, and this question cannot be answered using current neuroimaging approaches.

76           Because it can take humans years to learn and consolidate semantic or conceptual knowledge  
77 [23], we still do not know how long replay contributes to this process, as neuroimaging studies are  
78 limited to a time-span of a day or two. Humans are thought to “reconsolidate” information every time  
79 it is retrieved [24], suggesting replay might play a continual role in the lifespan of memory. However  
80 recordings in rodents have shown that replay diminishes with repeated exposure to an environment  
81 over multiple days [25], suggesting the brain only replays recently learned, vulnerable information.  
82 Answering this question in humans remains a challenge because of the practicalities of tracking replay  
83 events for extended periods.

84           It has been frequently observed that replay and consolidation selectively benefit weakly-  
85 learned over well-learned information [5, 26-28], but a candidate mechanism for how this occurs in  
86 the brain has not been proposed to date.

87           Our understanding of replay in the human brain is therefore limited by the difficulty in  
88 measuring and perturbing this covert, spontaneous process. However, an alternative approach which  
89 can address these outstanding questions, is to harness the recent considerable advances in artificial  
90 neural networks. While replay has been previously simulated in smaller-scale networks [29-31], in  
91 order to make direct comparisons with the human brain, we simulated learning and replay in a deep  
92 convolutional neural network (DCNN) which mirrors the brain’s layered structure and representations  
93 [32, 33] and approaches human-level recognition performance [34]. To simulate new learning in  
94 humans, we took a network which has already been trained to successfully categorise 1000 categories  
95 of objects in photographs, akin to a fully functional visual system in humans, and tasked it with learning  
96 10 novel categories. This is equivalent to a human coming across 10 new categories and using their  
97 lifelong experience in processing visual information to extrapolate the relevant identifying features.  
98 After learning periods, we then simulated replay in the network, akin to human consolidation during  
99 sleep. We targeted replay at specific network layers functionally equivalent to different brain regions  
100 to make novel predictions about where in the brain replay is causally effective. We evaluated whether  
101 prior reports of replay in early visual areas are likely to be relevant to memory consolidation. Because

102 earlier brain regions are thought to extract equivalent basic features from all categories, we predicted  
103 replay of experience would be more effective in promoting learning at advanced stages of the  
104 network. We also simulated “imagined” prototypical replay events and determine whether this was  
105 as effective as veridical replay in helping us to generalise to new, unseen experiences, thus supporting  
106 our conceptualization of replay as a creative process. We simulated the learning of categories across  
107 multiple experiences to make predictions about when in learning replay is likely to be effective in  
108 boosting subsequent generalisation performance. We hypothesised that the benefits of replay may  
109 be confined to early in the learning curve when novel category knowledge is being acquired. We also  
110 tested a mechanism through which the brain selects certain items for replay, adding an auxiliary model  
111 (akin to the hippocampus) to the neocortical model, which could autonomously learn the best  
112 consolidation strategy, determining what to replay and when. We predicted that this dynamic process  
113 would result in the prioritisation of weakly-learned items, in line with behavioural studies of memory  
114 consolidation. The overall aim of these experiments was to provide answer questions about memory  
115 replay in humans using a model of the human visual ventral stream, and this aim was successfully  
116 achieved.

117

## 118 **2. Results**

### 119 **2.1 Localising where in the ventral visual stream generative replay is likely to enhance** 120 **generalisation**

121 We first sought to establish where in the visual brain the replay of category knowledge might be most  
122 effective in helping to generalise to new experiences, as the functional relevance of replay observed  
123 in many different brain regions has yet to be established. To simulate the replay process, we used a  
124 DCNN called VGG-16, which is already experienced at recognising real-world objects as it has learned  
125 to categorise 1000 categories from over one million naturalistic photographs [35]. Like humans, it can  
126 generalise to new situations, and correctly identify the category of an exemplar it has never seen

127 before. It has achieved a high “Brain-Score” which is a benchmark for how closely a neural network  
128 reflects the brain’s neural representations and object recognition behaviour in primates [36]. It can  
129 therefore be viewed as approximating key aspects of a mature visual brain that can support the  
130 learning of new categories. Humans readily learn new categories all the time, using previous visual  
131 representations to extract useful features such as colour, texture and shape across multiple  
132 experiences with an object. VGG-16 emulates this process by using the equivalent building blocks of  
133 its own visual experience to extract the key features of objects contained in photographs. Therefore,  
134 to simulate new category learning in humans, we tasked this network with learning 10 new categories  
135 of objects it has never encountered before. To obtain a baseline measure of how the network would  
136 perform without replay, the network learned these 10 new categories in the absence of offline replay.  
137 This can be thought of as a human learning new categories in a lab experiment over the course of a  
138 single day, without any opportunity to sleep and consolidate this information in between training  
139 blocks. Next, we implemented memory replay. We considered it unrealistic that the human brain  
140 could store and replay every single category exemplar it has experienced. Alternatively, humans  
141 readily abstract, and are quick to recognise a prototype, or “typical” concept which is representative  
142 of category members they have seen [37], and this process is facilitated by an increased number of  
143 experiences [38]. Ultimately, this process is important because having a mental prototype helps us to  
144 differentiate between categories [39]. We therefore deemed it more feasible, efficient, and realistic  
145 that humans replay prototypical representations of a category which have been abstracted across  
146 learning. We assume, based on neuroimaging studies, that the category prototypes are inherited from  
147 higher level regions such as the hippocampus and prefrontal cortex [40], regions which facilitate the  
148 learning of concepts [41] and imagination [42, 43] of concepts. For the purposes of these experiments,  
149 we mimic the function of these higher brain regions in generating prototypical concepts by capturing  
150 the “typical” activation of the network for that category and sampling from this gist-like  
151 representation to create novel, abstracted representations for replay (Fig 1A). Most replay

152 representations were lower resolution than those during learning (see Methods and Models) for  
153 computational efficiency and to reflect the notional nature of mental imagery.

154 We simulated generative replay from different layers in the DCNN, equivalent to different  
155 brain regions along the ventral stream. Specifically, we trained the network over 10 epochs,  
156 corresponding to 10 days of learning, and replayed prototypical representations after each training  
157 epoch, simulating 10 nights of offline consolidation during sleep. In Fig 1B we show how replay affects  
158 the ability of the network to generalise to new exemplars of the categories over the course of learning,  
159 and Fig 1C shows the final best performing models in each replay condition. There is a differential  
160 benefit of replay throughout the network, where replay in the early layers yields is of limited benefit,  
161 whereas replay in the later layers boosts generalisation performance. This suggests that early visual  
162 areas in the brain do not contain sufficient category-specific information to form useful replay  
163 representations, whereas higher-level regions such as the lateral occipital cortex can support the  
164 generation of novel, prototypical concepts which accelerates learning in the absence of real  
165 experience and helps us to generalise to new situations.

166

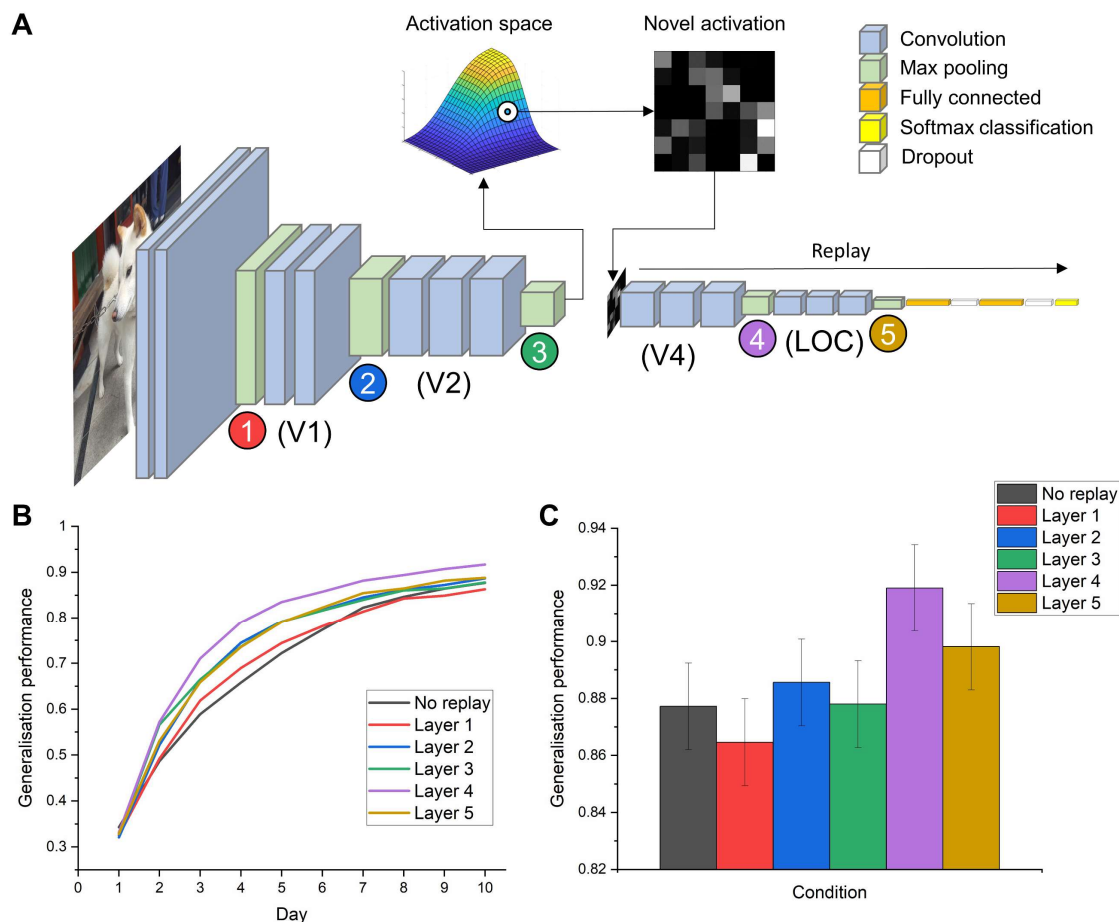

167

168 **Fig 1. The effects of generative replay from different layers of a model of the human ventral visual**  
 169 **stream on generalisation to new exemplars.** (A) The VGG-16 network simulates the brain’s visual  
 170 system by looking at photographs and extracting relevant features to help categorise the objects  
 171 within. We trained this network on 10 new categories of objects it had not seen before. In between  
 172 learning episodes, akin to sleep-facilitated consolidation in humans, we implemented offline memory  
 173 replay as a generative process. In other words, the network “imagined” new examples of a category  
 174 based on the distribution of features it has learned so far for that object (activation space), and used  
 175 these representations (novel representation) to consolidate its memory. The network did not create  
 176 an actual visual stimulus to learn from, rather it recreated the neuronal pattern of activity that it would  
 177 typically generate from viewing an object from that category. We display here an example of replaying  
 178 from a mid-point in the network, but all five locations where replay was implemented are indicated  
 179 by the coloured circles. The brain regions corresponding approximately to each network stage, derived  
 180 from Güçlü and van Gerven (32), are listed beneath. (B) The effects of memory replay from different  
 181 layers on the network’s ability to generalise to new examples of the 10 categories, throughout the  
 182 course of 10 learning episodes. Plotted values represent the mean accuracies from 10 different models  
 183 which each learned 10 new and different categories. (D) The final recognition accuracies (+/- S.E.M.),  
 184 averaged across 10 models, on the new set of photographs after 10 epochs of learning. We reveal the  
 185 location in a model of the ventral stream where replay maximally enhances generalisation  
 186 performance is an advanced layer which bears a functional correspondence to the lateral occipital  
 187 cortex (LOC) in humans. The benefits of replay from other locations were less pronounced, with the  
 188 earliest layer showing the least benefit to generalisation.  
 189



## 190 **2.2 Tracking the benefits of replay across learning**

191 Humans encounter new environments throughout their lives, and novel categories which they wish  
192 to learn. This knowledge is accumulated and refined across multiple experiences, forming a learning  
193 curve for each category. Experiments have focused on the replay of very recently learned information,  
194 therefore it is not clear at what point in this learning curve replay is most effective. One could consider  
195 replay of recently learned information to be more adaptive, for example, one might want to rapidly  
196 consolidate the memory of a plant from which one ate a poisonous berry as one does not want to  
197 repeat that experience. Alternatively, generative replay may be less effective for newly encountered  
198 categories because there are insufficient experiences from which to adequately extract the underlying  
199 prototype. This is a challenging question to address in human experiments, but simulation in an  
200 artificial neural network provides an alternate avenue of investigation. In the second experiment, we  
201 extended training to 30 days of experience, interleaved with nights of offline generative replay to  
202 simulate learning over longer timescales (Fig 2A). Guided by the results of experiment one, we  
203 implemented replay from an advanced layer corresponding to the lateral occipital cortex. In Figure  
204 2D, we show that offline generative replay is most effective at improving generalisation to new  
205 exemplars at the earliest stages of learning. This suggests replay facilitates rapid generalisation, which  
206 maximises performance given a limited set of experiences with a category.

207

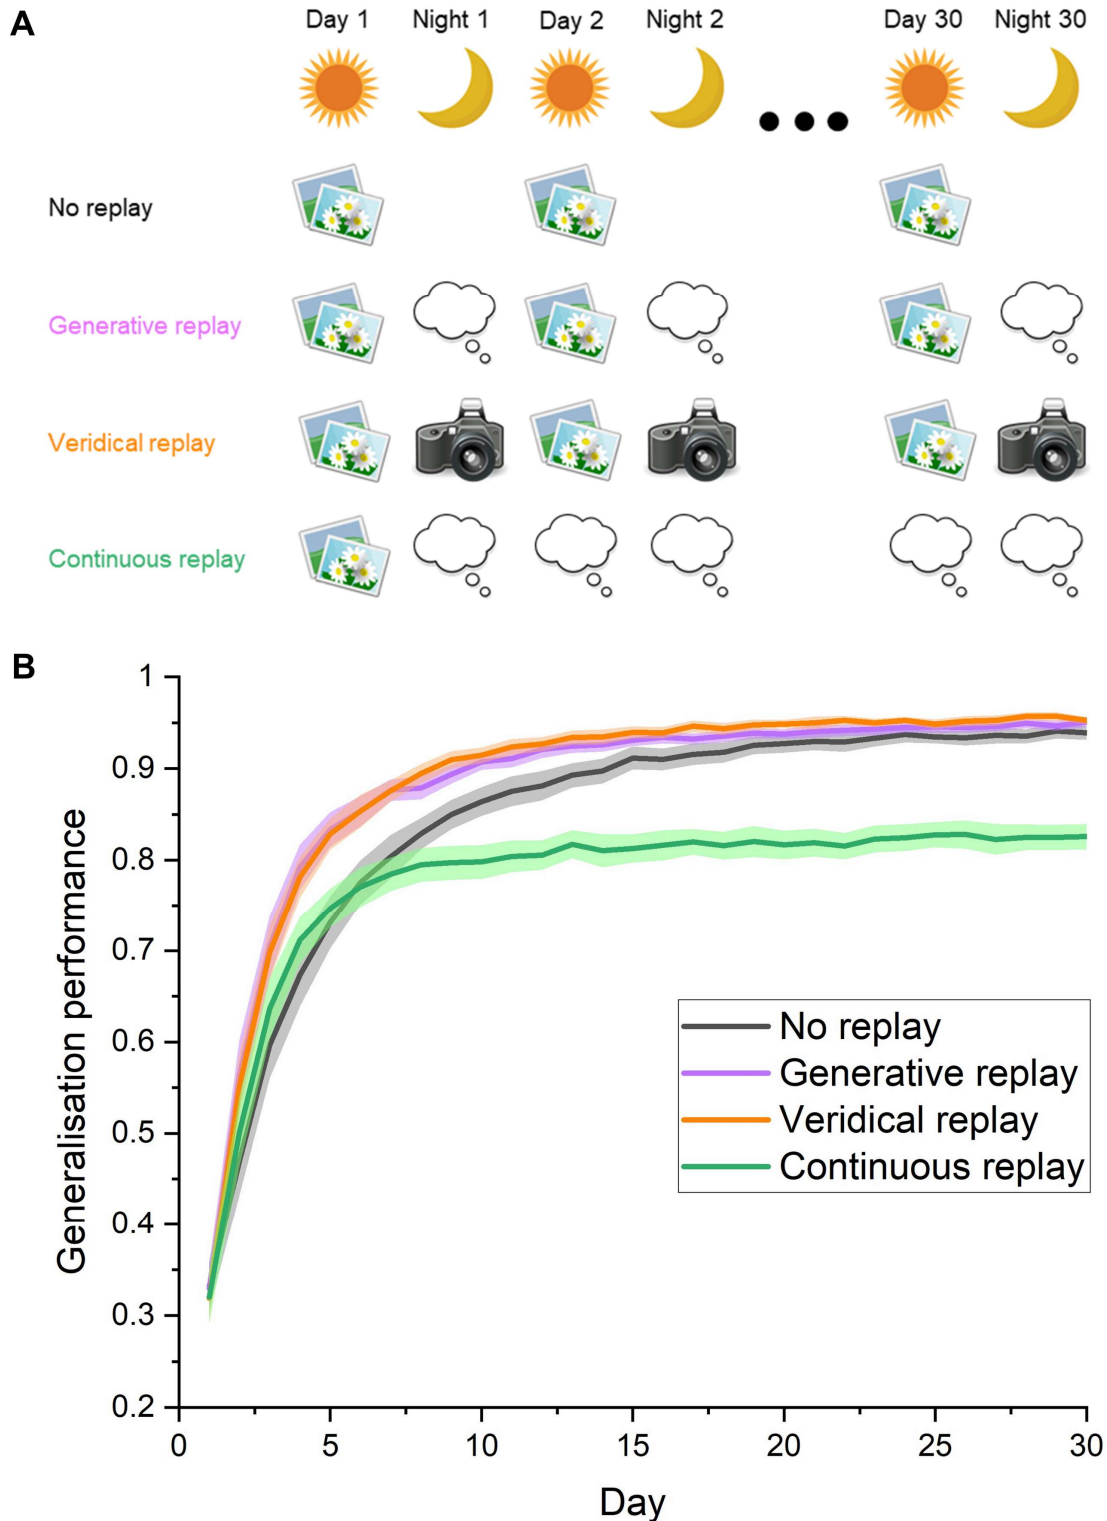

208

209 **Fig 2. The facilitatory effects of memory replay across category learning.** We simulate the long-  
210 term consolidation of category memory by extending training to 30 days. (A) Schematic showing the  
211 different experimental conditions. “No replay” involves the model of the visual system learning the  
212 10 new categories without replay in between episodes. “Generative replay” simulates the brain  
213 imagining and replaying novel instances of a category during “night” periods of offline consolidation,

214 from a layer equivalent to the lateral occipital cortex. “Veridical replay” tests the hypothetical  
215 performance of a human who, each night, replays every single event which has been experienced  
216 the preceding day. “Continuous replay” simulates a single day of learning, followed by days and  
217 nights of replay, investigating the maximum benefit afforded by replay given only brief exposure to a  
218 category. (B) The ability of the network to generalise to new exemplars of a category during each  
219 day throughout the learning process. Generalisation performance is measured by the proportion (+/  
220 S.E.M) of correctly recognised test images across 10 models. Generative replay maximally increases  
221 performance early in training, suggesting it is critical for new learning and recent memory  
222 consolidation. Despite being comprised of internally generated fictive experiences, generative replay  
223 was comparably effective to veridical replay throughout the learning process, rendering it an  
224 attractive, efficient and more realistic solution to memory consolidation which does not involve  
225 remembering all experiences. Continuous replay after just one day of learning substantially  
226 improved generalisation performance, but never reached the accuracy levels of networks which  
227 engaged in further learning. Replay can therefore compensate for sparse experience to a significant  
228 degree, however its limitations also reveal generative replay to be dynamic process, whereby replay  
229 representations are informed and improved in tandem with ongoing interleaved learning.

230  
231 While establishing that generative replay, or imagining new instances of a category during offline  
232 periods, was highly effective in helping to generalise to new category exemplars, we were interested  
233 to compare generative replay with the unlikely veridical, high-resolution scenario whereby humans  
234 could replay thousands of encounters with individual objects exactly as they were experienced. We  
235 termed this “veridical replay” (Fig 2A), which involved capturing the exact neural patterns associated  
236 with each experienced object during learning, and replaying this from the same point in the network.  
237 As can be seen in Fig 2B, generative replay was as effective as veridical replay of experience in  
238 consolidating memory, despite being entirely imagined from the networks prior experience. This is  
239 despite being a low-resolution gist-like representation, perhaps akin to dreaming about unusual  
240 blends of experiences during sleep. This provides compelling support for the hypothesis that  
241 generative replay is the most likely form of category replay in humans, as it is vastly more efficient to  
242 imagine new concepts from an extracted prototype.

243         While the aforementioned results show the benefits of replay under optimal conditions where  
244 humans encounter the same categories every day, there are instances where exposure will be limited.  
245 To what extent can offline replay compensate for this limited learning? We simulated this in our model  
246 of the ventral stream by limiting the learning of actual category photographs to one day, and  
247 substituted all subsequent learning experiences with offline replay, termed “continuous replay” (Fig

248 2A). This is equivalent to a human learning a new category in a one-time lab experiment, and replaying  
249 this experience during rest and sleep for the following month. Despite the absence of further exposure  
250 to the actual objects, we found the network could increase its generalisation accuracy from 32% to  
251 83% purely by replaying imagined instances of concepts it has partially learned. This may partly  
252 account for human's ability to quickly learn from limited experience. However, it also reveals that  
253 replayed representations are dynamic in nature, as the prototypes generated from that first  
254 experience were not sufficient to train the network to its maximum performance, as is observed when  
255 learning and replay are interleaved. This suggests that replayed representations continue to improve  
256 as they are informed by ongoing learning, therefore generative replay in the human brain throughout  
257 learning can be thought of as a constantly evolving "snapshot" of what has been learned so far about  
258 that category.

259

### 260 **2.3 Determining how the brain might select experiences for replay**

261 Memory consolidation favours weakly-learned information, with a tendency to replay fragile  
262 memories more often [5]. How the brain targets these vulnerable representations remains a mystery.  
263 Memory replay throughout the brain is triggered by hippocampal activity [8], and given the role of the  
264 hippocampus in the generation of prototypes [40], it is likely the hippocampus selects categories for  
265 generative replay. We proposed that replay may be a learning process in itself, whereby the  
266 hippocampus selects replay items, and learns through feedback from the neocortex the optimal ones  
267 to replay. In our previous simulations we selected all categories for replay in equal number, however  
268 to simulate the autonomous nature of replay selection in the brain, we supplemented our model of  
269 the ventral visual stream with a small reinforcement learning network, assuming the theoretical role  
270 of the hippocampus in deciding what to replay (Fig 3A). The hippocampal model could choose one of  
271 the 10 categories to replay, and received a reward from the main network for that action, based on  
272 the improvement in network performance. Categories associated with a high reward were more likely

273 to be subsequently replayed, therefore the hippocampal side network could learn through trial and  
274 error which categories to replay more often in the cortical network.

275 We trained our model of the visual system on 10 novel categories, implementing replay during  
276 offline periods as before, and compared its generalisation performance with that of the dual  
277 interactive hippocampal-cortical model. In terms of overall accuracy, both approaches performed  
278 similarly throughout training (Fig 3B). However, the reinforcement learning network which simulated  
279 the hippocampal replay systematically selected categories which were originally relatively weakly  
280 learned more often (Fig 3C), which resulted in their selective improvement. However, this came at a  
281 cost, with originally well-learned categories being replayed less often and a drop in their generalisation  
282 accuracy. We propose therefore that such a reinforcement learning process may underlie the  
283 “rebalancing” of experience in the brain, and that replay helps to compensate for the fact that some  
284 categories are more difficult to learn than others.

285

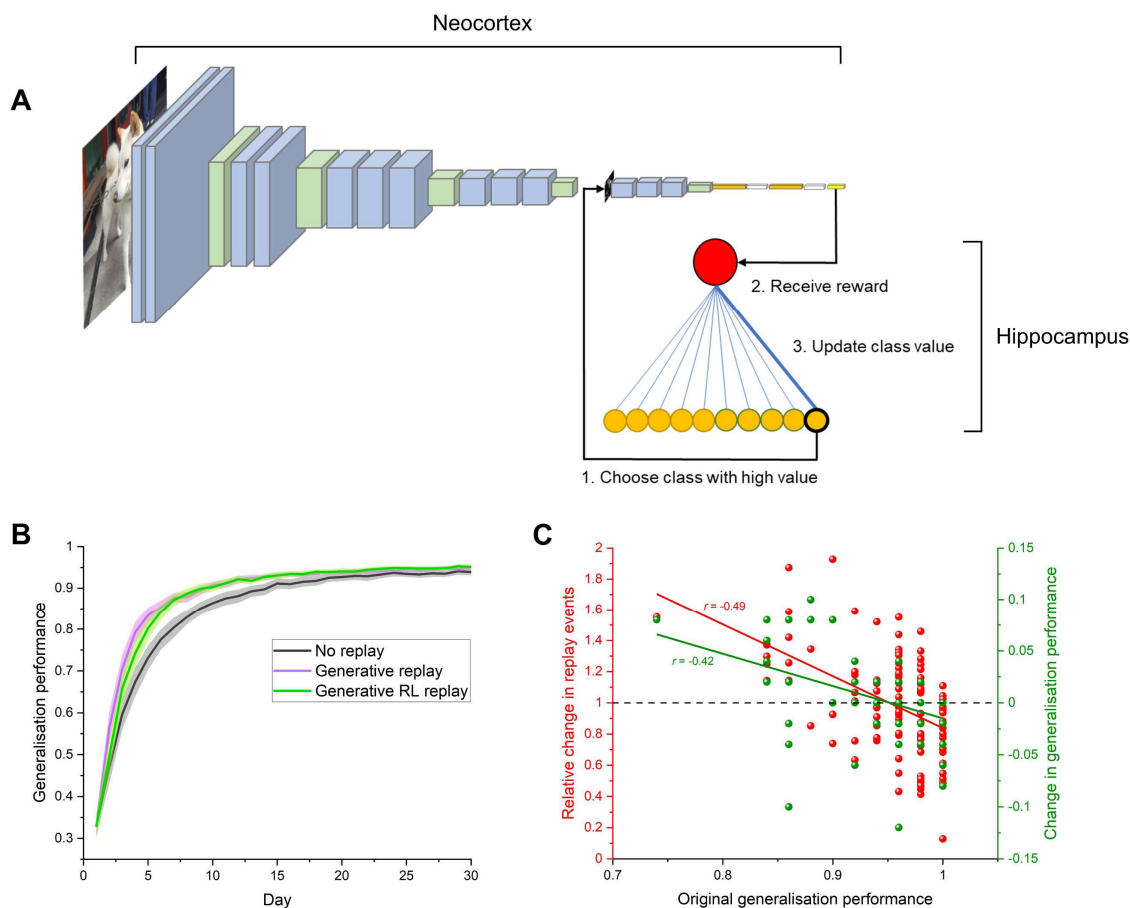

286

287 **Fig 3. Replay as a reinforcement learning process simulates the brain's tendency to consolidate**  
288 **weaker knowledge.** (A) Replay in a model of the visual system is controlled by a reinforcement  
289 learning (RL) network akin to the hippocampus. The RL network selects one of 10 categories to replay  
290 through the visual system and receives a reward based on the improved performance, learning  
291 through trial and error which categories to replay. (B) Overall generalisation performance on new  
292 category exemplars was similar for both generative replay and generative replay controlled by a  
293 reinforcement learning network. Generalisation performance represents mean accuracy (+/- S.E.M)  
294 on test images across 10 models which each learned 10 new categories. (C) The RL network learns to  
295 replay categories which were originally more difficult for the visual system, and improves their  
296 accuracy. This effectively "rebalances" memory such that category knowledge is more evenly  
297 distributed, and offers a candidate mechanism as to how the brain chooses weakly learned  
298 information for replay. Plotted values represent the 100 categories across 10 models. A proportion of  
299 the generalisation performance values are overlapping.  
300

### 301 **3. Discussion**

302 We simulated the consolidation of category knowledge in a large-scale neural network model which  
303 closely mirrors the form and function of the human ventral visual system, by replaying prototypical  
304 representations thought to be formed and initiated by the hippocampus. The notion that replay might

305 be generative in nature has been suggested by smaller simulations [30, 31], however our results using  
306 a realistic model of the visual brain represent the most compelling evidence to date that humans are  
307 unlikely to replay experiences verbatim during rest and sleep to improve category knowledge, and are  
308 more likely to replay novel, imagined instances instead. In addition, the large number (117,000) of  
309 high-resolution complex naturalistic images we used for training in this experiment reflected real-  
310 world learning and facilitated the extraction of gist-like features. While empirical evidence exists that  
311 humans replay novel sequences of stimuli [4], our work suggests that the brain goes further and uses  
312 learned features of objects to construct entirely fictive experiences to replay. We speculate that this  
313 creative process is particularly important for the consolidation of category knowledge as opposed to  
314 the replay of episodic memory [5, 8, 15], because of the requirement to abstract prototypical features  
315 and use these to generalise to new examples of a category. We propose that generative replay confers  
316 additional advantages such as constituting less of a burden on memory resources, as not all  
317 experiences need to be remembered. Further, our replay representations were highly effective in  
318 consolidating category knowledge despite being down-sampled, and these compressed, low-  
319 resolution samples would reduce storage requirements further. Perhaps the most convincing  
320 demonstration in our simulations that category replay in the brain likely adopts this compressed,  
321 prototypical format is that it was as effective as the exact veridical replay of experience in boosting  
322 generalisation performance. Our findings therefore prompt a reconceptualization of the nature of  
323 replay in humans, that it is not only generative, but also low resolution or “blurry”, as is the case with  
324 internally generated imagery in humans [44, 45]. In fact, the kind of replay we propose here may be  
325 the driving force behind the transformation of memory into a more schematic, generalised form which  
326 preserves regularities across experiences while allowing unique elements of experience to fade [46-  
327 48]. The challenge for future empirical studies in humans to confirm our hypothesis, will be to decode  
328 prototypical replay representations during rest and sleep.

329           Simulating replay in a human-like network also allowed us to answer a question not currently  
330 tractable in neuroimaging studies: where in the visual stream is replay functionally relevant to

331 consolidation? In keeping with our observation that low-resolution, coarse, schematic replay was  
332 effective in helping the network to generalise, we found the most effective location for replay to be  
333 in the most advanced layers of the network, layers which are less granular in their representations.  
334 This approximately corresponds to the lateral occipital cortex in humans, a region which represents  
335 more complex, high-level features [32]. In contrast, generative replay from the earliest layers  
336 corresponding to early visual cortex was ineffective, suggesting more precise, fine-grained replay  
337 might not be optimal in preparing the brain to recognise novel instances of a category. In addition,  
338 these layers are sensitive to low-level visual features such as contrast and edges, which are likely  
339 shared across all categories, and therefore do not contain enough distinctive information to be useful  
340 for replay or generalisation. High-level representations on the other hand, may contain more unique  
341 combinations and abstractions of these lower-level features. This prompts a re-evaluation of the  
342 functional relevance of replay in early visual cortices in both animals and humans, and generates  
343 specific hypotheses for potential perturbation studies to investigate the effects of disruptive  
344 stimulation at different stages of the ventral stream during offline consolidation.

345 Our simulations also revealed a phenomenon never before tested in humans, that the  
346 effectiveness of replay depends on the stage of learning. We acquire factual information about the  
347 world sporadically over time across contexts, for example we may encounter a new species at a zoo  
348 one day, and subsequently see the same animal on a wildlife documentary, and so on. Ultimately the  
349 consolidation of semantic information in the neocortex can take up to years to complete [23].  
350 However, our simulations show that replay is most beneficial during the initial encounters with a novel  
351 category, when we are still working out its identifiable features and have not yet learned to generalise  
352 perfectly to unseen instances. It is therefore likely humans replay a category less and less with  
353 increasing familiarity, and there is some support for this idea in the animal literature [25]. We  
354 speculate that the enhanced effectiveness for recent memories may have an adaptive function,  
355 allowing us to generalise quickly with limited information. In fact, our simulations showed that after a  
356 single learning episode, replay can compensate substantially for an absence of subsequent



357 experience. Our results provide novel hypotheses for human experiments, testing for an interaction  
358 between the stage of category learning and the extent of replay. The fact that replay early in the  
359 learning process was more effective provides further support for our proposal that vague, imprecise  
360 replay events are useful for generalisation, as the networks imaginary representations at that stage  
361 would be an imperfect approximation of the category in question.

362 Our results also represent the first mechanistic account of how the brain selects weakly-  
363 learned information for replay and consolidation [5, 26-28]. The hippocampus triggers replay events  
364 in the neocortex [8], with a loop of information back and forth between the two brain areas [49],  
365 although the content of this neural dialogue is not known. Our simulations suggest that the  
366 hippocampus could learn the optimal categories to replay based on feedback from the neocortex. Our  
367 results showed that such a process resulted in the “rebalancing” of experience, where generalisation  
368 performance was improved for weakly learned items, and attenuated for items which were strongly  
369 learned. This reorganisation of knowledge has been observed in electrophysiological investigations in  
370 rodents, where the neural representations of novel environments are strengthened through  
371 reactivation at the peak of the theta cycle, while those corresponding to familiar environments are  
372 weakened through replay during the trough [50]. This more even distribution of knowledge could be  
373 adaptive in both ensuring adequate recognition performance across all categories and forming a more  
374 general foundation on top of which future conceptual knowledge can be built. Future experiments  
375 could assess whether our interactive models choose the same categories for replay as humans when  
376 trained on the same stimuli.

377 In summary, our simulations provide strong evidence that category replay in humans is a  
378 generative process which is functionally relevant at advanced stages of the ventral stream. We make  
379 testable predictions about when during learning replay is likely to be effective and offer a novel  
380 account of replay as a learning process in and of itself between the hippocampus and neocortex. We  
381 hope these findings encourage a closer dialogue between theoretical models and empirical  
382 experiments. These findings also add credence to the emerging perspective that deep learning

383 networks are powerful tools which are becoming increasingly well-positioned to resolve challenging  
384 neuroscientific questions [51].

385

## 386 **4. Methods and models**

### 387 **4.1 Neural network**

388 To simulate the learning of novel concepts in the brain, and test a number of hypotheses regarding  
389 replay, we trained a DCNN on 10 new categories of images. The neural network was VGG-16 [35].  
390 Emulating the extent of real-world learning in humans, this network is trained on a vast dataset of 1.3  
391 million naturalistic photographs known as the ImageNet database [52], which contains recognisable  
392 objects from 1000 categories in different contexts much like what humans encounter on a daily basis.  
393 The network learns to associate the visual features of an object with its category label, until it can  
394 recognise examples of that object which it has never seen before, reflecting the human ability to  
395 generalise prior knowledge to new situations. The network takes a photograph's pixels as input, and  
396 sequentially transforms this input into more abstract features, similar to the operation of the human  
397 ventral visual stream [36]. It learns to perform these transformations by adjusting 138,357,544  
398 connection weights across many layers. Its convolutional architecture reduces the number of possible  
399 training weights by searching for informative features in any area of the photographs.

400 This network which has been previously trained on 1000 categories can be thought of as  
401 equivalent to a fully functional visual system. This visual system allows humans to rapidly learn new  
402 categories because it facilitates the extraction of useful features to support learning. Similarly, the  
403 VGG-16 can learn novel categories which it has not learned before, based on its prior experience in  
404 interpreting visual input. In these experiments, we task the VGG-16 network with learning 10 new  
405 categories of images. To do this, we retained take the pre-trained "base" of this network, which  
406 consisted of 19 layers, organised into five convolutional blocks. Within each block there were  
407 convolutional layers and a pooling layer, with nonlinear activation functions. To this base, we attached  
408 two fully connected layers, each followed by a "dropout" layer, which randomly zeroed out 50% of

409 units to prevent overfitting to the training set [53]. At the end of the network a SoftMax layer was  
410 attached, which predicted which of 10 classes an image belonged to. To facilitate the learning of 10  
411 new classes, the weights of layers attached to the pre-trained base were randomly initialised. All  
412 model parameters were free to be trained. In total, 10 new models were trained, each learning 10  
413 new and different classes.

414

#### 415 **4.2 Stimuli**

416 Photographic stimuli for new classes were drawn randomly from the larger ImageNet 2011 fall  
417 database [54], and were screened manually by the experimenter to exclude classes which bore a close  
418 resemblance to classes which VGG-16 was originally trained on. In total, 100 new classes were  
419 selected, and randomly assigned to the 10 different models to be trained. Within each class, a set of  
420 1,170 training images, 130 validation images, and 50 test images were selected. The list of the selected  
421 classes is available in Supplementary Table S1.

422

#### 423 **4.3 Baseline training**

424 We first trained a model without implementing replay, to serve as a baseline measure of network  
425 performance, and compare with other conditions which implemented replay. Ten models were  
426 trained on 10 new and different classes. To further prevent overfitting to the training set, images were  
427 augmented before each training epoch. This is equivalent to a human viewing an object at different  
428 locations, or from different angles, and facilitates the extraction of useful features rather than rote  
429 memorisation of experience. Augmentation could include up to 20-degree rotation, 20% vertical or  
430 horizontal shifting, 20% zoom, and horizontal flipping. Any blank portions of the image following  
431 augmentation were filled with a reflection of the existing image. Images were then pre-processed in  
432 accordance with Simonyan and Zisserman (35). Depending on the experiment, the network was  
433 trained for 10 or 30 epochs. We used the Adam optimiser [55] with a learning rate of 0.0003. The  
434 training batch size was set to 36. The training objective was to minimise the categorical cross-entropy

435 loss over the 10 classes. Training parameters were optimised based on validation set performance.  
436 We report the model's performance metrics from the test set only, which reflects the model's ability  
437 to generalise to new stimuli during and after training. Training was performed using TensorFlow  
438 version 2.2.

439

#### 440 **4.4 Replay**

441 Replay was conducted between training epochs, to simulate "days" of learning and "nights" of offline  
442 consolidation. We conceptualised replay representations as generative, in other words they  
443 represented a prototype of that category never seen before, from a particular point in the network.  
444 This represents an alternative to storing every experience in our heads, in that we could replay  
445 important knowledge about the world without remembering everything. To generate these  
446 representations, the network activations induced by the training images from the preceding epoch  
447 were extracted from a particular layer in the network using the Keract toolbox [56]. For each class  
448 separately, a multivariate distribution of activity was created from these activations, representing the  
449 unique relationship between units of the layer which were observed for that specific class. We then  
450 sampled randomly from this distribution, creating novel activation patterns for that class at that point  
451 in the network (Figure 1). The end result was a representation that was a rough approximation of the  
452 layer's representations of that category if a real image was processed, but novel in nature. This would  
453 be equivalent in the brain to an approximate pattern of neural activity which is representative of that  
454 category at a particular stage in the ventral visual stream. These prototypical concepts would be likely  
455 generated from more high-level regions such as the hippocampus and prefrontal cortex [12, 40].

456         The number of novel representations created for replay was equivalent to the number of  
457 original training images (1,170). To test where in the network replay is most effective, this process was  
458 performed at one of five different network locations, namely the max pooling layers at the end of each  
459 block (Figure 1). For the first four pooling layers, creating a multivariate distribution from such a large  
460 number of units was computationally intractable, therefore activations for each filter in these layers

461 were first down-sampled by a factor of four for blocks one and two, and by two for blocks three and  
462 four. The samples drawn from the resulting distribution were then up-sampled back to their original  
463 resolution. These lower-resolution samples are also theoretically relevant, in that they are more akin  
464 to the schematic nature of mental and dream imagery which takes place during rest and sleep. To  
465 replay these samples through the network, the VGG-16 network was temporarily disconnected at the  
466 layer where replay was implemented, and a new input layer was attached which matched the  
467 dimensions of the replay representations. This truncated network was trained on the replay samples  
468 using the same parameters as regular training. After each epoch of replay training, the replay section  
469 of the network was reattached to the original base, and training on real images through the whole  
470 network resumed. To simulate veridical replay, in other words the replay of each individual experience  
471 as it happened, rather than the generation of new samples, we used the activations for each item at  
472 that layer in the network during replay periods. These were not down-sampled during the process.  
473 Given how many examples of a concept we generally encounter, veridical replay of all experience is  
474 not a realistic prospect, which is why prior attempts to simulate replay in smaller-scale networks have  
475 also avoided this scenario in their approaches [30, 31].

476

#### 477 **4.5 Replay within a reinforcement learning framework**

478 We tested a process through which items which are most beneficial for replay may be selected in the  
479 brain. We proposed that such selective replay may involve an interaction between the main concept  
480 learning network (VGG-16), and a smaller network which learned through reinforcement which  
481 concepts are most beneficial to replay through the main network during offline periods. The neural  
482 analogue of such a network could be thought of as the hippocampus, as the activity of this structure  
483 precedes the widespread reactivation of neural patterns observed during replay [8]. This approach is  
484 similar to the “teacher-student” meta-learning framework which has been shown to improve  
485 performance in deep neural networks [57]. The side network was a simple regression network with  
486 10 inputs, one for each class, and one output, which was the predicted value for replaying that class

487 through the main network. Classes were chosen and replayed one at a time, with a batch size of 36.  
488 To train the side network, a value of 1 was inputted for the chosen class, with zeros for the others.  
489 The predicted reward for the side network was the change in performance of the main network after  
490 each replay instance, which was quantified by a change in chi-square; a contrast of the maximum  
491 number of possible correct predictions by the main network, versus its actual correct predictions. A  
492 positive reward was therefore a reduction in chi-square, which resulted in an increase in the side  
493 network's weight for that class. This led to the class being more likely to be chosen in future, as the  
494 network's weights were converted into a SoftMax layer, from which classes were selected  
495 probabilistically for replay. Through this iterative process, the side network learned which classes were  
496 more valuable to replay, and continually updated its preferences based on the performance of the  
497 main network. Reducing the chi-square in this dynamic manner improves the overall network accuracy  
498 as it progressively reduces the disparity between the network's classifications and the actual class  
499 identities. To generate initial values for the side network, one batch of each class was replayed through  
500 the main network. The Adam optimiser was used with a learning rate of 0.001 and the objective was  
501 to minimise the mean squared error loss. The side network was trained for 50 epochs with each replay  
502 batch. The assessment of network improvement was always performed on the validation set, and the  
503 reported values are accuracy on the test set, reflecting the ability of the network to generalise to new  
504 situations.

505

506 **Funding information:** This research was supported by NIH Grant 1P01HD080679  
507 (<https://www.nih.gov/>), Royal Society Wolfson Fellowship 183029 (<https://royalsociety.org/>), and a  
508 Wellcome Trust Senior Investigator Award WT106931MA (<https://wellcome.org/>) held by B.C.L.  
509 The funders had no role in study design, data collection and analysis, decision to publish, or  
510 preparation of the manuscript.

511

512 **Competing Interests:** The authors have declared that no competing interests exist.

513 **Author Contributions:** D.N.B: Conceptualization, methodology, software, data curation,  
514 investigation, formal analysis, visualization, writing-original draft preparation, writing-review &  
515 editing. B.C.L.: Conceptualization, methodology, resources, funding acquisition, supervision, writing-  
516 review & editing.

517

518 **Data and Code Availability:** The code, environment, and additional information required to run the  
519 simulations is available at <https://github.com/danielbarry1/replay.git> and in the supplementary  
520 information. All relevant data in the paper is available at  
521 <https://doi.org/10.6084/m9.figshare.14208470>.

522

## 523 **5. References**

- 524 1. Wilson MA, McNaughton BL. Reactivation of hippocampal ensemble memories during sleep.  
525 Science. 1994;265(5172):676-9. doi: 10.1126/science.8036517.
- 526 2. Tambini A, Davachi L. Persistence of hippocampal multivoxel patterns into postencoding rest  
527 is related to memory. Proceedings of the National Academy of Sciences of the United States of  
528 America. 2013;110(48):19591-6. doi: 10.1073/pnas.1308499110.
- 529 3. Hermans EJ, Kanen JW, Tambini A, Fernández G, Davachi L, Phelps EA. Persistence of  
530 amygdala–hippocampal connectivity and multi-voxel correlation structures during awake rest after  
531 fear learning predicts long-term expression of fear. Cerebral cortex. 2017;27(5):3028-41. doi:  
532 10.1093/cercor/bhw145.
- 533 4. Liu Y, Dolan RJ, Kurth-Nelson Z, Behrens TEJ. Human replay spontaneously reorganizes  
534 experience. Cell. 2019;178(3):640-52.e14. doi: 10.1016/j.cell.2019.06.012.
- 535 5. Schapiro AC, McDevitt EA, Rogers TT, Mednick SC, Norman KA. Human hippocampal replay  
536 during rest prioritizes weakly learned information and predicts memory performance. Nature  
537 communications. 2018;9(1):3920. doi: 10.1038/s41467-018-06213-1.
- 538 6. Wittkuhn L, Schuck NW. Dynamics of fMRI patterns reflect sub-second activation sequences  
539 and reveal replay in human visual cortex. Nature communications. 2021;12(1):1795. doi:  
540 10.1038/s41467-021-21970-2.
- 541 7. Schönauer M, Alizadeh S, Jamalabadi H, Abraham A, Pawlizki A, Gais S. Decoding material-  
542 specific memory reprocessing during sleep in humans. Nature communications. 2017;8:15404. doi:  
543 10.1038/ncomms15404.
- 544 8. Zhang H, Fell J, Axmacher N. Electrophysiological mechanisms of human memory  
545 consolidation. Nature communications. 2018;9(1):4103. doi: 10.1038/s41467-018-06553-y.
- 546 9. Friedrich M, Wilhelm I, Born J, Friederici AD. Generalization of word meanings during infant  
547 sleep. Nature communications. 2015;6(1):6004. doi: 10.1038/ncomms7004.
- 548 10. Horváth K, Liu S, Plunkett K. A daytime nap facilitates generalization of word meanings in  
549 young toddlers. Sleep. 2016;39(1):203-7. doi: 10.5665/sleep.5348.

- 550 11. Schapiro AC, McDevitt EA, Chen L, Norman KA, Mednick SC, Rogers TT. Sleep benefits  
551 memory for semantic category structure while preserving exemplar-specific information. *Scientific*  
552 *reports*. 2017;7(1):14869. doi: 10.1038/s41598-017-12884-5.
- 553 12. Hassabis D, Kumaran D, Vann SD, Maguire EA. Patients with hippocampal amnesia cannot  
554 imagine new experiences. *Proceedings of the National Academy of Sciences of the United States of*  
555 *America*. 2007;104(5):1726-31. doi: 10.1073/pnas.0610561104.
- 556 13. Gupta AS, van der Meer MA, Touretzky DS, Redish AD. Hippocampal replay is not a simple  
557 function of experience. *Neuron*. 2010;65(5):695-705. doi: 10.1016/j.neuron.2010.01.034.
- 558 14. Stella F, Baracskey P, O'Neill J, Csicsvari J. Hippocampal reactivation of random trajectories  
559 resembling brownian diffusion. *Neuron*. 2019;102(2):450-61.e7. doi: 10.1016/j.neuron.2019.01.052.
- 560 15. Deuker L, Olligs J, Fell J, Kranz TA, Mormann F, Montag C, et al. Memory consolidation by  
561 replay of stimulus-specific neural activity. *The Journal of Neuroscience*. 2013;33(49):19373-83. doi:  
562 10.1523/jneurosci.0414-13.2013.
- 563 16. Ji D, Wilson MA. Coordinated memory replay in the visual cortex and hippocampus during  
564 sleep. *Nature neuroscience*. 2007;10(1):100-7. doi: 10.1038/nn1825.
- 565 17. de Voogd LD, Fernández G, Hermans EJ. Awake reactivation of emotional memory traces  
566 through hippocampal–neocortical interactions. *NeuroImage*. 2016;134:563-72. doi:  
567 10.1016/j.neuroimage.2016.04.026.
- 568 18. Tambini A, Ketz N, Davachi L. Enhanced brain correlations during rest are related to memory  
569 for recent experiences. *Neuron*. 2010;65(2):280-90. doi: 10.1016/j.neuron.2010.01.001.
- 570 19. Staresina BP, Alink A, Kriegeskorte N, Henson RN. Awake reactivation predicts memory in  
571 humans. *Proceedings of the National Academy of Sciences of the United States of America*.  
572 2013;110(52):21159-64. doi: 10.1073/pnas.1311989110.
- 573 20. Girardeau G, Inema I, Buzsáki G. Reactivations of emotional memory in the hippocampus–  
574 amygdala system during sleep. *Nature neuroscience*. 2017;20(11):1634. doi: 10.1038/nn.4637.
- 575 21. Eichenlaub J-B, Jarosiewicz B, Saab J, Franco B, Kelemen J, Halgren E, et al. Replay of learned  
576 neural firing sequences during rest in human motor cortex. *Cell reports*. 2020;31(5):107581. doi:  
577 10.1016/j.celrep.2020.107581.
- 578 22. Peyrache A, Khamassi M, Benchenane K, Wiener SI, Battaglia FP. Replay of rule-learning  
579 related neural patterns in the prefrontal cortex during sleep. *Nature neuroscience*. 2009;12(7):919-  
580 26. doi: 10.1038/nn.2337.
- 581 23. Manns JR, Hopkins RO, Squire LR. Semantic memory and the human hippocampus. *Neuron*.  
582 2003;38(1):127-33. doi: 10.1016/S0896-6273(03)00146-6.
- 583 24. Dudai Y. The restless engram: consolidations never end. *Annual review of neuroscience*.  
584 2012;35:227-47. doi: 10.1146/annurev-neuro-062111-150500.
- 585 25. Giri B, Miyawaki H, Mizuseki K, Cheng S, Diba K. Hippocampal reactivation extends for  
586 several hours following novel experience. *The Journal of Neuroscience*. 2019;39(5):866-75. doi:  
587 10.1523/JNEUROSCI.1950-18.2018
- 588 26. Drosopoulos S, Windau E, Wagner U, Born J. Sleep enforces the temporal order in memory.  
589 *PloS one*. 2007;2(4):e376. doi: 10.1371/journal.pone.0000376.
- 590 27. Kuriyama K, Stickgold R, Walker MP. Sleep-dependent learning and motor-skill complexity.  
591 *Learning & memory*. 2004;11(6):705-13. doi: 10.1101/lm.76304.
- 592 28. McDevitt EA, Duggan KA, Mednick SC. REM sleep rescues learning from interference.  
593 *Neurobiology of learning and memory*. 2015;122:51-62. doi: 10.1016/j.nlm.2014.11.015.
- 594 29. González OC, Sokolov Y, Krishnan GP, Delanois JE, Bazhenov M. Can sleep protect memories  
595 from catastrophic forgetting? *eLife*. 2020;9:e51005. doi: 10.7554/eLife.51005.
- 596 30. Kemker R, Kanan C. Farnet: Brain-inspired model for incremental learning. *arXiv preprint*  
597 *arXiv:171110563*. 2017.
- 598 31. van de Ven GM, Siegelmann HT, Tolias AS. Brain-inspired replay for continual learning with  
599 artificial neural networks. *Nature communications*. 2020;11(1):4069. doi: 10.1038/s41467-020-  
600 17866-2.



- 601 32. Güçlü U, van Gerven MA. Deep neural networks reveal a gradient in the complexity of neural  
602 representations across the ventral stream. *J Neurosci*. 2015;35(27):10005-14. doi:  
603 10.1523/JNEUROSCI.5023-14.2015.
- 604 33. Khaligh-Razavi SM, Kriegeskorte N. Deep supervised, but not unsupervised, models may  
605 explain IT cortical representation. *PLoS computational biology*. 2014;10(11):e1003915. doi:  
606 10.1371/journal.pcbi.1003915.
- 607 34. He K, Zhang X, Ren S, Sun J, editors. Delving deep into rectifiers: Surpassing human-level  
608 performance on imagenet classification. *Proceedings of the IEEE international conference on  
609 computer vision*; 2015.
- 610 35. Simonyan K, Zisserman A. Very deep convolutional networks for large-scale image  
611 recognition. *arXiv preprint arXiv:14091556*. 2014.
- 612 36. Schrimpf M, Kubilius J, Hong H, Majaj NJ, Rajalingham R, Issa EB, et al. Brain-Score: Which  
613 artificial neural network for object recognition is most brain-Like? *bioRxiv*. 2018:407007. doi:  
614 10.1101/407007.
- 615 37. Posner MI, Keele SW. On the genesis of abstract ideas. *Journal of experimental psychology*.  
616 1968;77(3):353. doi: 10.1037/h0025953.
- 617 38. Donald H, Joseph C, Don C, David G, Steven S. Prototype abstraction and classification of  
618 new instances as a function of number of instances defining the prototype. *Journal of Experimental  
619 Psychology*. 1973;101(1):116-22. doi: 10.1037/h0035772.
- 620 39. Reed SK. Pattern recognition and categorization. *Cognitive Psychology*. 1972;3(3):382-407.  
621 doi: 10.1016/0010-0285(72)90014-X.
- 622 40. Bowman CR, Iwashita T, Zeithamova D. Tracking prototype and exemplar representations in  
623 the brain across learning. *eLife*. 2020;9. doi: 10.7554/eLife.59360.
- 624 41. Mack ML, Love BC, Preston AR. Building concepts one episode at a time: The hippocampus  
625 and concept formation. *Neuroscience letters*. 2018;680:31-8. doi: 10.1016/j.neulet.2017.07.061.
- 626 42. Hassabis D, Kumaran D, Maguire EA. Using imagination to understand the neural basis of  
627 episodic memory. *The Journal of Neuroscience*. 2007;27(52):14365-74. doi:  
628 10.1523/JNEUROSCI.4549-07.2007.
- 629 43. Mack ML, Preston AR, Love BC. Ventromedial prefrontal cortex compression during concept  
630 learning. *Nature communications*. 2020;11(1):46. doi: 10.1038/s41467-019-13930-8.
- 631 44. Giusberti F, Cornoldi C, De Beni R, Massironi M. Differences in vividness ratings of perceived  
632 and imagined patterns. *British Journal of Psychology*. 1992;83(4):533-47. doi: 10.1111/j.2044-  
633 8295.1992.tb02457.x.
- 634 45. Lee SH, Kravitz DJ, Baker CI. Disentangling visual imagery and perception of real-world  
635 objects. *NeuroImage*. 2012;59(4):4064-73. doi: 10.1016/j.neuroimage.2011.10.055.
- 636 46. Winocur G, Moscovitch M. Memory transformation and systems consolidation. *Journal of  
637 the International Neuropsychological Society : JINS*. 2011;17(5):766-80. doi:  
638 10.1017/S1355617711000683.
- 639 47. Sweegers CCG, Talamini LM. Generalization from episodic memories across time: A route for  
640 semantic knowledge acquisition. *Cortex; a journal devoted to the study of the nervous system and  
641 behavior*. 2014;59:49-61. doi: 10.1016/j.cortex.2014.07.006.
- 642 48. Love BC, Medin DL. SUSTAIN: A model of human category learning. *Aaai/iaai*. 1998:671-6.
- 643 49. Rothschild G, Eban E, Frank LM. A cortical-hippocampal-cortical loop of information  
644 processing during memory consolidation. *Nature neuroscience*. 2017;20(2):251-9. doi:  
645 10.1038/nn.4457.
- 646 50. Poe GR, Nitz DA, McNaughton BL, Barnes CA. Experience-dependent phase-reversal of  
647 hippocampal neuron firing during REM sleep. *Brain research*. 2000;855(1):176-80. doi:  
648 10.1016/S0006-8993(99)02310-0.
- 649 51. Richards BA, Lillicrap TP, Beaudoin P, Bengio Y, Bogacz R, Christensen A, et al. A deep  
650 learning framework for neuroscience. *Nature neuroscience*. 2019;22(11):1761-70. doi:  
651 10.1038/s41593-019-0520-2.

- 652 52. Deng J, Dong W, Socher R, Li L-J, Li K, Fei-Fei L. Imagenet: A large-scale hierarchical image  
653 database. 2009 IEEE conference on computer vision and pattern recognition. 2009:248-55.  
654 53. Srivastava N, Hinton G, Krizhevsky A, Sutskever I, Salakhutdinov R. Dropout: a simple way to  
655 prevent neural networks from overfitting. The journal of machine learning research.  
656 2014;15(1):1929-58.  
657 54. Russakovsky O, Deng J, Su H, Krause J, Satheesh S, Ma S, et al. ImageNet large scale visual  
658 recognition challenge. International Journal of Computer Vision. 2015;115(3):211-52. doi:  
659 10.1007/s11263-015-0816-y.  
660 55. Kingma DP, Ba J. Adam: A method for stochastic optimization. arXiv preprint arXiv:14126980.  
661 2014.  
662 56. Remy P. Keract: A library for visualizing activations and gradients. GitHub repository. 2020.  
663 57. Fan Y, Tian F, Qin T, Li X-Y, Liu T-Y. Learning to teach. arXiv preprint arXiv:180503643. 2018.  
664

665

666

667

668

669

670

671

672

673

674

675

676

677

678

679

680

681

682

683

684 Supplementary table S1: List of ImageNet classes by model

|         |                                                                                                  |
|---------|--------------------------------------------------------------------------------------------------|
| Model 1 | n12360108 begonia                                                                                |
|         | n02822579 bedstead bedframe                                                                      |
|         | n02427724 waterbuck                                                                              |
|         | n03098688 control room                                                                           |
|         | n02944075 camisole                                                                               |
|         | n01603600 waxwing                                                                                |
|         | n03196598 digital display alphanumeric display                                                   |
|         | n02848216 blade                                                                                  |
|         | n07712856 tortilla chip                                                                          |
|         | n03592669 jalousie                                                                               |
| Model 2 | n11853356 Christmas cactus Schlumbergera buckleyi Schlumbergera baridgesii                       |
|         | n04177820 settle settee                                                                          |
|         | n03904183 pedestrian crossing zebra crossing                                                     |
|         | n04355511 sundress                                                                               |
|         | n03487444 hand lotion                                                                            |
|         | n12899752 angel's trumpet Brugmansia suaveolens Datura suaveolens                                |
|         | n12655869 raspberry raspberry bush                                                               |
|         | n12948053 common European dogwood red dogwood blood-twigg pedwood Cornus sanguinea               |
|         | n02869737 bongo bongo drum                                                                       |
|         | n02415253 Dall sheep Dall's sheep white sheep Ovis montana dalli                                 |
| Model 3 | n03375575 foil                                                                                   |
|         | n03082807 compressor                                                                             |
|         | n03262932 easy chair lounge chair overstuffed chair                                              |
|         | n02047614 puffin                                                                                 |
|         | n03317788 faience                                                                                |
|         | n09475044 wasp's nest wasps' nest hornet's nest hornets' nest                                    |
|         | n11784497 jack-in-the-pulpit Indian turnip wake-robin Arisaema triphyllum Arisaema atropurpureum |
|         | n03941231 pinata                                                                                 |
|         | n02813399 bay window bow window                                                                  |
|         | n04544325 wainscoting wainscotting                                                               |
| Model 4 | n03993053 potty seat potty chair                                                                 |
|         | n04082886 reticle reticule graticule                                                             |
|         | n03421324 garter belt suspender belt                                                             |
|         | n03766044 miller milling machine                                                                 |
|         | n03505504 headscarf                                                                              |
|         | n12384839 love-in-a-mist running pop wild water lemon Passiflora foetida                         |
|         | n03619793 kitbag kit bag                                                                         |
|         | n07600696 candied apple candy apple taffy apple caramel apple toffee apple                       |
|         | n02068974 dolphin                                                                                |
|         | n03237992 dressing gown robe-de-chambre lounging robe                                            |
| Model 5 | n02918964 bumper car Dodgem                                                                      |
|         | n02392824 white rhinoceros Ceratotherium simum Diceros simus                                     |

|         |                                                                             |
|---------|-----------------------------------------------------------------------------|
|         | n01806364 blue peafowl Pavo cristatus                                       |
|         | n02956699 capitol                                                           |
|         | n04290079 spun yarn                                                         |
|         | n08596076 littoral litoral littoral zone sands                              |
|         | n02887970 bracelet bangle                                                   |
|         | n10635788 sphinx                                                            |
|         | n07901457 muscat muscatel muscadel muscadelle                               |
|         | n07870167 lasagna lasagne                                                   |
| Model 6 | n04324387 stockroom stock room                                              |
|         | n04591517 wind turbine                                                      |
|         | n02988486 CD-R compact disc recordable CD-WO compact disc write-once        |
|         | n04568069 weathervane weather vane vane wind vane                           |
|         | n04514241 uplift                                                            |
|         | n03207835 dishtowel dish towel tea towel                                    |
|         | n13206817 maidenhair maidenhair fern                                        |
|         | n03307792 external drive                                                    |
|         | n12666965 cape jasmine cape jessamine Gardenia jasminoides Gardenia augusta |
|         | n12950126 valerian                                                          |
| Model 7 | n03986355 portfolio                                                         |
|         | n11848479 night-blooming cereus                                             |
|         | n04439712 tinfoil tin foil                                                  |
|         | n03160740 damask                                                            |
|         | n01612122 sparrow hawk American kestrel kestrel Falco sparverius            |
|         | n09206896 arroyo                                                            |
|         | n12392549 stinging nettle Urtica dioica                                     |
|         | n02343772 gerbil gerbille                                                   |
|         | n07875436 risotto Italian rice                                              |
|         | n02060133 fulmar fulmar petrel Fulmarus glacialis                           |
| Model 8 | n03655072 legging leging leg covering                                       |
|         | n10738111 unicyclist                                                        |
|         | n09270735 dune sand dune                                                    |
|         | n03409393 gable gable end gable wall                                        |
|         | n02331046 rat                                                               |
|         | n03452267 gramophone acoustic gramophone                                    |
|         | n10105733 forward                                                           |
|         | n07911677 cocktail                                                          |
|         | n03797182 muffler                                                           |
|         | n01563128 warbler                                                           |
| Model 9 | n04197110 shipwreck                                                         |
|         | n10470779 priest                                                            |
|         | n02769290 backhoe                                                           |
|         | n03478756 hall                                                              |
|         | n04519153 valve                                                             |
|         | n04289027 sprinkler                                                         |
|         | n02782778 ballpark park                                                     |

|          |                                            |
|----------|--------------------------------------------|
|          | n03558404 ice skate                        |
|          | n04138261 satin                            |
|          | n02700064 alternator                       |
| Model 10 | n03524150 hockey stick                     |
|          | n03716966 mandolin                         |
|          | n02962200 carburetor carburettor           |
|          | n03237340 dresser                          |
|          | n04004210 printed circuit                  |
|          | n02917377 bullhorn loud hailer loud-hailer |
|          | n07879953 tempura                          |
|          | n04087826 ribbing                          |
|          | n02404432 longhorn Texas longhorn          |
|          | n07830593 hot sauce                        |

685

686
